# Supplementary material for: A Metabolomics Approach to the Identification of Urinary Biomarkers of Pea Intake
Source: PubMed Central journal article supplement (PMC6315433; doi:10.3390/nu10121911), 2018-12-04
Supplement: nutrients-10-01911-s001.pdf [file nutrients-10-01911-s001.pdf]

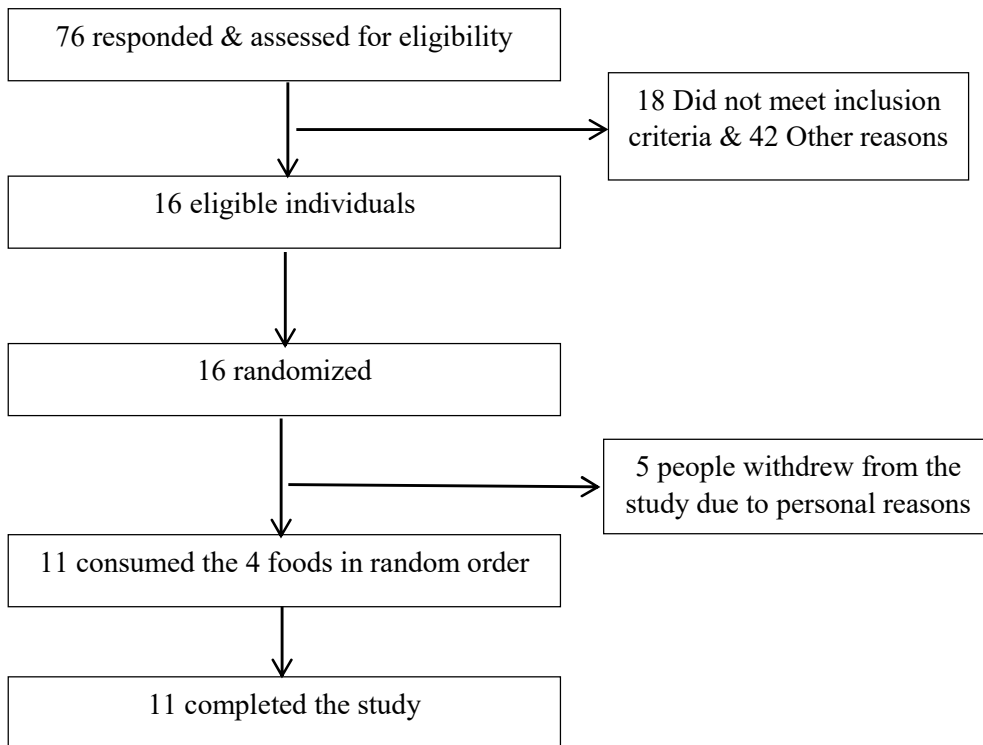

**Figure S1.** Flow chart of the recruitment of the participants of the discovery study.

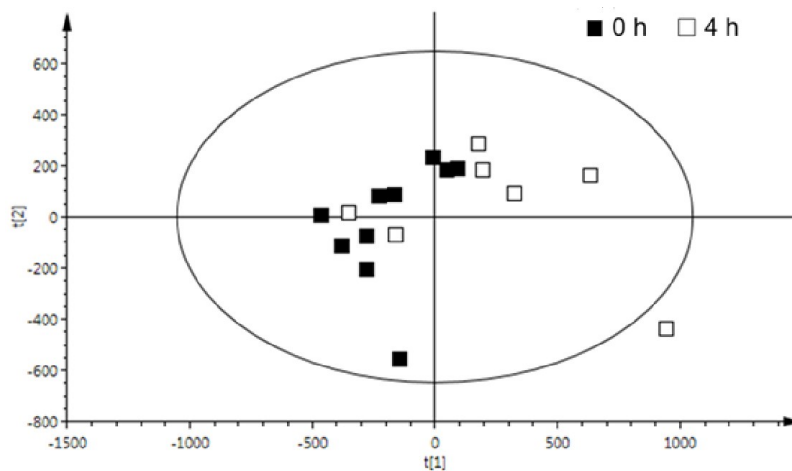

**Figure S2.** Principal component analysis (PCA) of UPLC-QTOF/MS urine data of time point 0 (■) compared with time point 4 hours post consumption (□).  $Q^2$ , 0.217;  $R^2X$ , 0.579;  $t[1]$ , PLS component 1;  $t[2]$ , PLS component 2.

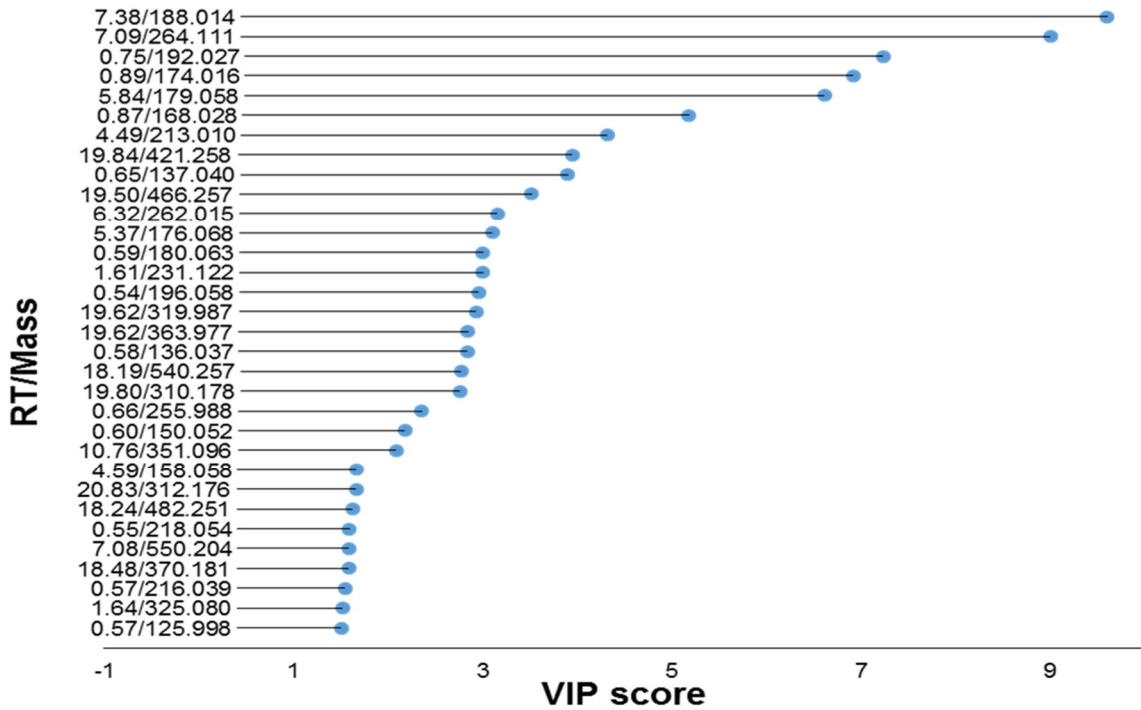

**Figure S3.** Variable importance of projection (VIP) score plot ( $\geq 1.5$ ) of 0 h vs. 4 h model (generated from PLS-DA) indicating the most discriminant metabolites in decreasing order. X-axis represents the VIP score and Y-axis indicates features represented with retention time (RT) and mass. The plot was generated from the data obtained from the discovery study.

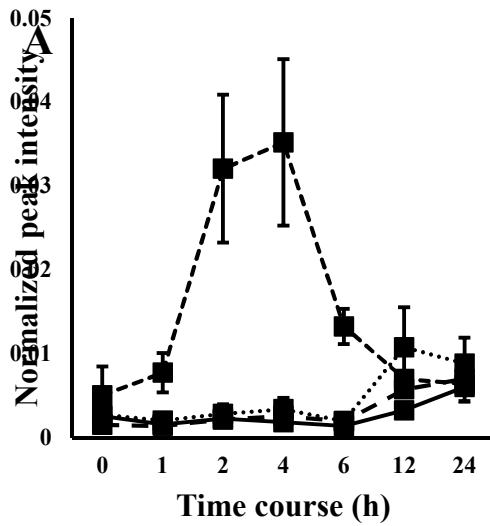

(A)

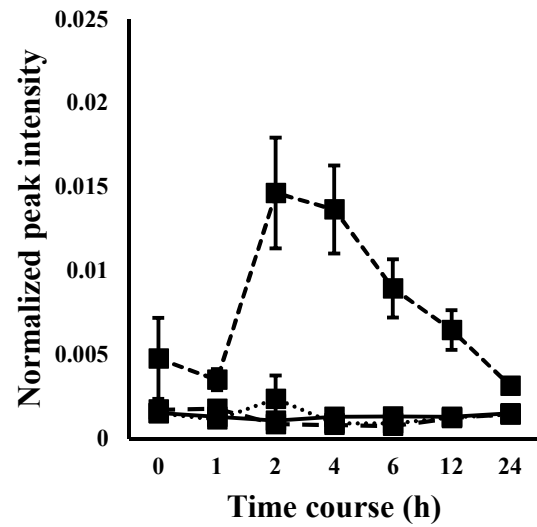

(B)

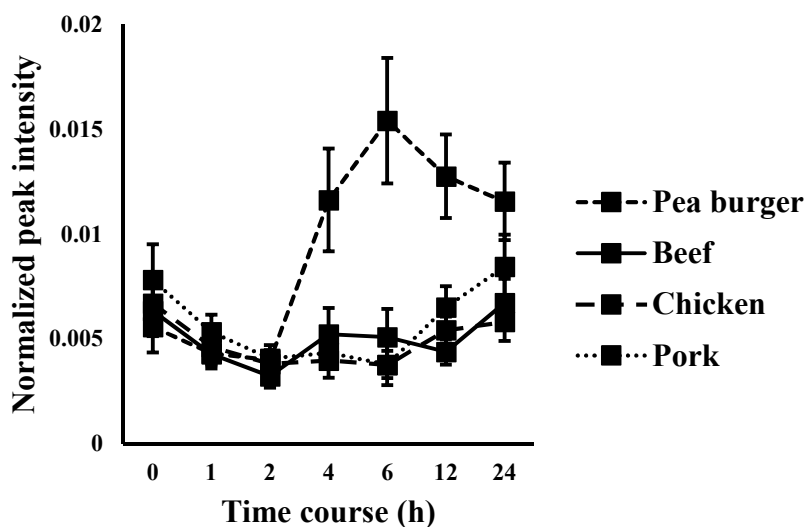

(C)

**Figure S4.** 2-IPMA (A), ASP-Val (B), NC (C) metabolites showing a differential time-course when pea burger (control) was compared with beef, chicken and pork in an independent study.

**Table S1.** Significant features identified by One-way repeated measures ANOVA in Negative ion mode.

| Feature <sup>a</sup> | Average Normalized Intensity <sup>b</sup> | <i>p</i> -Value <sup>c</sup> |
|----------------------|-------------------------------------------|------------------------------|
| 1.051/193.9884       | 253.49 ± 244.46                           | 1.7781E-05                   |
| 0.989/362.017        | 74.85 ± 66.14                             | 5.1499E-05                   |
| 0.953/223.9991       | 214.61 ± 193.96                           | 5.1499E-05                   |
| 18.01/434.2151       | 279.62 ± 361.55                           | 5.1499E-05                   |
| 16.012/200.105       | 435.69 ± 354.86                           | 0.00011                      |
| 9.168/274.0148       | 1089.83 ± 843.33                          | 0.00015                      |
| 18.445/226.1203      | 163.51 ± 75.13                            | 0.00023                      |
| 0.927/392.0272       | 84.66 ± 80.30                             | 0.00065                      |
| 13.442/266.1264      | 99.74 ± 120.02                            | 0.00083                      |
| 13.098/190.1203      | 22.80 ± 17.42                             | 0.00083                      |
| 1.358/320.0742       | 275.60 ± 295.97                           | 0.00083                      |
| 13.643/380.1682      | 255.94 ± 239.62                           | 0.00083                      |
| 16.229/541.2194      | 18.64 ± 12.69                             | 0.00083                      |
| 17.899/569.2504      | 17.32 ± 11.43                             | 0.00093                      |
| 17.68/478.2404       | 61.09 ± 48.18                             | 0.00135                      |
| 8.806/304.0252       | 93.90 ± 53.13                             | 0.00135                      |
| 18.97/436.2306       | 193.31 ± 174.40                           | 0.00135                      |
| 18.33/320.1472       | 174.06 ± 184.65                           | 0.00255                      |
| 1.611/556.2011       | 53.10 ± 44.58                             | 0.00373                      |
| 0.577/79.9258        | 21.72 ± 19.45                             | 0.00394                      |
| 14.885/188.1049      | 487.03 ± 327.43                           | 0.01105                      |
| 16.086/406.184       | 482.69 ± 492.76                           | 0.01139                      |
| 19.233/426.1251      | 42.59 ± 18.81                             | 0.02400                      |
| 19.605/449.3133      | 188.18 ± 100.20                           | 0.02686                      |
| 0.557/103.9639       | 338.04 ± 283.74                           | 0.02747                      |
| 0.643/214.0234       | 243.25 ± 137.86                           | 0.03447                      |
| 19.633/447.2982      | 351.25 ± 207.51                           | 0.03489                      |
| 0.855/493.9674       | 23.49 ± 13.73                             | 0.03876                      |

|                 |                    |         |
|-----------------|--------------------|---------|
| 16.127/246.1465 | 129.97 ± 98.87     | 0.04243 |
| 5.78/176.0684   | 993.78 ± 997.29    | 0.04243 |
| 0.879/130.0266  | 5223.42 ± 1462.60  | 0.04243 |
| 19.08/290.1288  | 62.47 ± 22.90      | 0.04243 |
| 0.568/188.0443  | 736.90 ± 399.13    | 0.04520 |
| 19.427/584.3185 | 125.35 ± 76.55     | 0.04520 |
| 11.879/412.1148 | 60.51 ± 24.65      | 0.04520 |
| 1.768/231.1218  | 786.78 ± 645.81    | 0.04520 |
| 0.891/174.0164  | 18397.71 ± 3839.19 | 0.04520 |
| 19.788/ 513.276 | 856.84 ± 518.44    | 0.04520 |
| 17.452/224.1047 | 186.48 ± 86.47     | 0.04520 |
| 6.665/189.0425  | 353.07 ± 128.96    | 0.04703 |
| 18.764/506.2721 | 19.49 ± 8.81       | 0.04721 |

<sup>a</sup> Feature is represented as retention time (RT) in min/ Mass <sup>b</sup> Intensities averaged across time-points for all the samples and normalized to osmolality <sup>c</sup> p-value obtained from multiple testing correction by false discovery rate

**Table S2.** Significant features identified by One-way repeated measures ANOVA in Positive ion mode.

| Features <sup>a</sup> | Average Normalized Intensity <sup>b</sup> | p-Value <sup>c</sup> |
|-----------------------|-------------------------------------------|----------------------|
| 18.044/451.241        | 45.66 ± 37.99                             | 0.00023              |
| 0.879/214.0965        | 166.77 ± 106.64                           | 0.00386              |
| 18.632/553.2159       | 123.21 ± 134.44                           | 0.00524              |
| 1.624/231.1218        | 1795.11 ± 1470.13                         | 0.00550              |
| 19.592/477.2415       | 105.74 ± 42.14                            | 0.00550              |
| 8.205/492.2583        | 22.22 ± 10.57                             | 0.00841              |
| 1.335/320.0737        | 126.11 ± 120.71                           | 0.00891              |
| 18.613/513.3401       | 40.60 ± 26.91                             | 0.01205              |
| 18.625/558.1722       | 50.32 ± 54.35                             | 0.01596              |
| 3.476/210.0642        | 409.78 ± 236.09                           | 0.02110              |
| 2.133/93.0212         | 72.73 ± 22.22                             | 0.02229              |
| 19.612/447.2977       | 1227.72 ± 836.43                          | 0.02357              |
| 1.467/289.1271        | 546.80 ± 190.10                           | 0.02841              |
| 10.479/329.184        | 860.62 ± 297.27                           | 0.03080              |
| 19.371/555.3867       | 41.57 ± 24.61                             | 0.03464              |
| 18.35/355.2357        | 602.21 ± 250.16                           | 0.03523              |
| 17.71/649.3672        | 15.52 ± 10.40                             | 0.03523              |
| 0.855/229.9835        | 589.57 ± 654.53                           | 0.03523              |
| 19.164/623.3313       | 34.20 ± 17.09                             | 0.03626              |
| 19.601/472.2667       | 35.73 ± 24.95                             | 0.03877              |
| 14.889/188.1045       | 275.54 ± 250.86                           | 0.04175              |
| 1.029/379.0311        | 34.88 ± 17.17                             | 0.04812              |

<sup>a</sup> Feature is represented as retention time (RT) in min/ Mass <sup>b</sup> Intensities averaged across time-points for all the samples and normalized to osmolality <sup>c</sup> p-value obtained from multiple testing correction by false discovery rate

**Table S3.** Dose response study population characteristics.

| Characteristics     | Male         | Female      |
|---------------------|--------------|-------------|
| No. of participants | 5            | 7           |
| Age, year           | 26 ± 3.5     | 26 ± 6.02   |
| Height, m           | 1.8 ± 0.07   | 1.6 ± 0.05  |
| Weight, kg          | 79.3 ± 10.23 | 62.2 ± 9.42 |

---

|                         |              |             |
|-------------------------|--------------|-------------|
| BMI, Kg/m <sup>2</sup>  | 24.9 ± 2.26  | 23.5 ± 3.31 |
| Waist circumference, cm | 82.8 ± 6.42  | 74 ± 8.07   |
| Hip circumference, cm   | 102.7 ± 7.26 | 99.6 ± 7.21 |
| Waist-hip-ratio         | 0.81 ± 0.02  | 0.74 ± 0.04 |

---

All values are mean ± SD.
